# Supplementary material for: Preparation and evaluation of osteogenic nano-MgO/PMMA bone cement for bone healing in a rat critical size calvarial defect
Source: Royal Society of Chemistry journal article supplement (doi:10.1039/d0tb00074d), 2020-01-01
Supplement: d0tb00074d1.pdf [file d0tb00074d1.pdf]

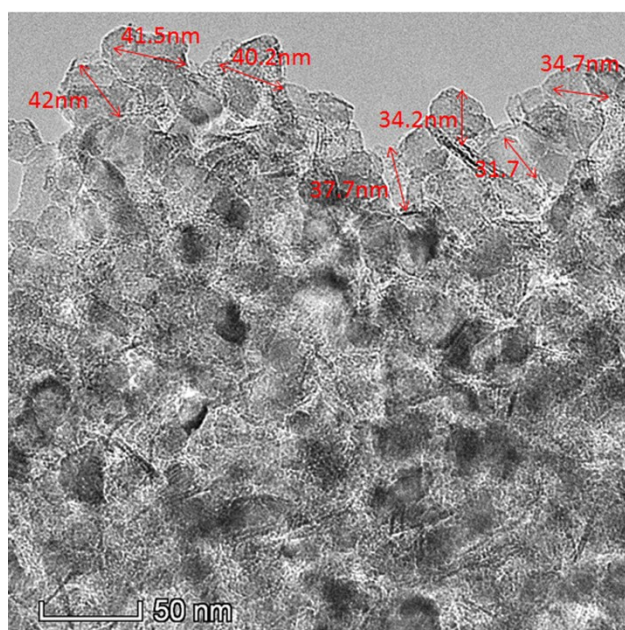

**Figure S1** TEM image of nano-MgO particles

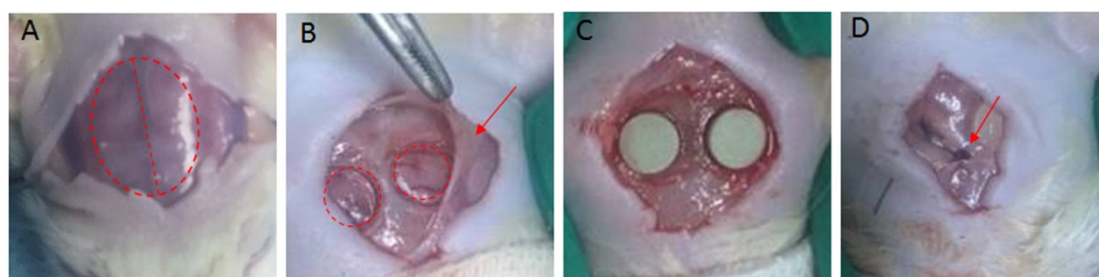

**Figure S2 Operative procedure of rat critical size calvarial defect creation and caution.** (A)The bone was exposed and the defect created by incision and retraction of the skin. (B)Periosteum(show as the red arrow) overling the calvarium and two 5-mm diameter calvarial defect were created by a trephine(show as the red circles) . (C)The bone cement was implanted in the defect and (D) the periosteum was sutured by a 4-Monocryl suture.

References:
